# Supplementary material for: The Cerato-Platanin protein Epl-1 from Trichoderma harzianum is involved in mycoparasitism, plant resistance induction and self cell wall protection
Source: PubMed Central journal article supplement (PMC4673615; doi:10.1038/srep17998), 2015-12-09
Supplement: srep17998-s1.pdf [file srep17998-s1.pdf]

## *Supplementary Material*

### **The Cerato-Platanin protein Epl-1 from *Trichoderma harzianum* is involved in mycoparasitism, plant resistance induction and self cell wall protection**

Eriston Vieira Gomes<sup>1</sup>, Mariana do Nascimento Costa<sup>1</sup>, Renato Graciano de Paula<sup>1</sup>, Rafael Ricci de Azevedo<sup>2</sup>, Francilene Lopes da Silva<sup>3</sup>, Eliane F. Noronha<sup>3</sup>, Cirano José Ulhoa<sup>4</sup>, Valdirene Neves Monteiro<sup>5</sup>, Rosa Elena Cardoza<sup>6</sup>, Santiago Gutiérrez<sup>6</sup>, Roberto Nascimento Silva<sup>1\*</sup>

1 - Department of Biochemistry and Immunology, Ribeirão Preto Medical School, University of São Paulo, Ribeirão Preto, SP, Brazil.

2 - Department of Molecular and Cellular Biology and Pathogenic Bioagents, Ribeirão Preto Medical School, University of São Paulo, Ribeirão Preto, SP, Brazil.

3 - Department of Cellular Biology, University of Brasilia, Brasília, Distrito Federal, Brazil.

4 - Department of Biochemistry and Cellular Biology, Biological Sciences Institute, Federal University of Goiás, Goiânia, Goiás, Brazil.

5 - Department of Biochemistry, State University of Goiás, Anápolis, Goiás, Brazil.

6 - Department of Microbiology, University School of Agricultural Engineers, University of León, Ponferrada, Spain.

#### **\*Correspondence:**

Dr. Roberto do Nascimento Silva

University of São Paulo

Ribeirão Preto Medical School

Department of Biochemistry and Immunology

3900, Bandeirantes Av.

14049-900

Ribeirão Preto, SP

[rsilva@fmrp.usp.br](mailto:rsilva@fmrp.usp.br)

## 1 - Supplementary Figures:

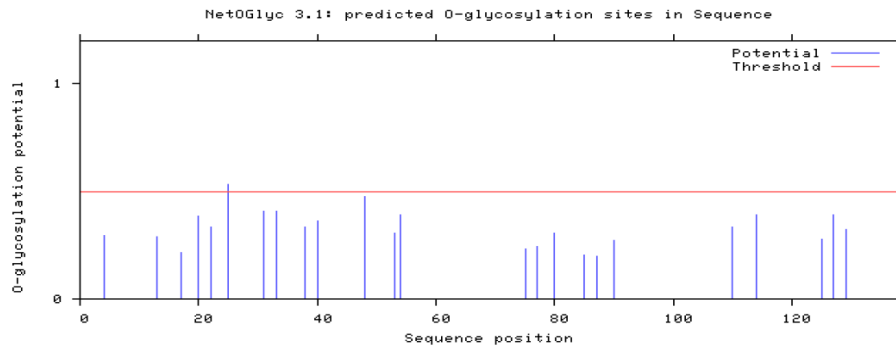

**Supplementary Figure 1:** Analysis of potential *O*-glycosylation sites in *T. harzianum* Epl-1 protein sequence. The red horizontal line indicates the threshold potential *O*-glycosylation. The blue vertical lines indicate the position of the site in the protein sequence. Sites with blue vertical lines which cross the red threshold line have potential *O*-glycosylation.

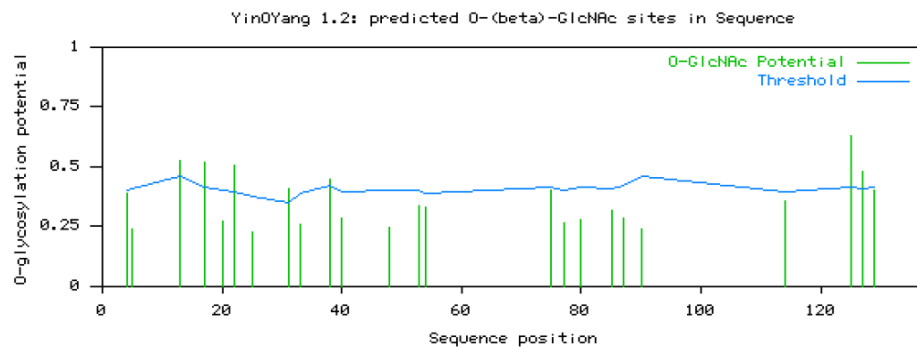

**Supplementary Figure 2:** Analysis of potential *O*- $\beta$ -*N*-Acetyl-Glicosilation sites in *T. harzianum* Epl-1 protein sequence. The horizontal blue line indicates the threshold potential *O*- $\beta$ -*N*-Acetyl glycosylation. The green vertical lines indicate the position of the site in the protein sequence. Sites with green vertical lines exceeding the threshold blue line have a potential of *O*- $\beta$ -*N*-Acetyl glycosylation.

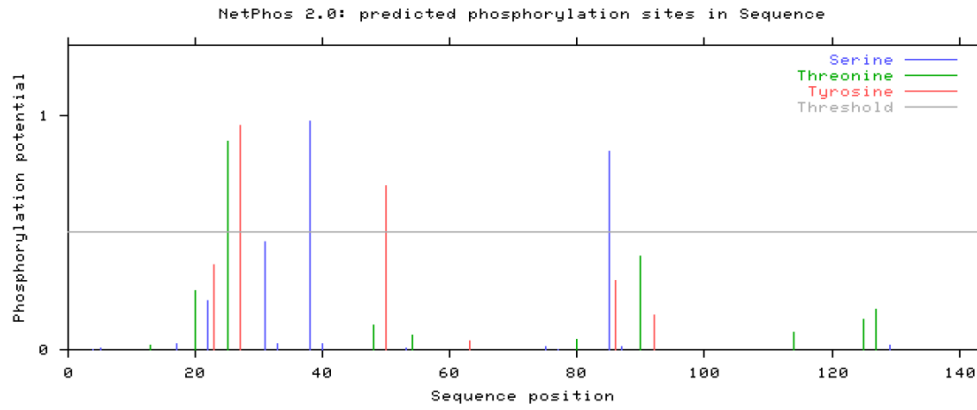

**Supplementary Figure 3:** Analysis of potential phosphorylation sites on *T. harzianum* Epl-1 protein sequence. The horizontal gray line indicates the threshold phosphorylation potential. The vertical colored lines indicate the potential amino acid; the position of the potential amino acid in the protein sequence. Sites with vertical lines cross the threshold line present potential phosphorylation.

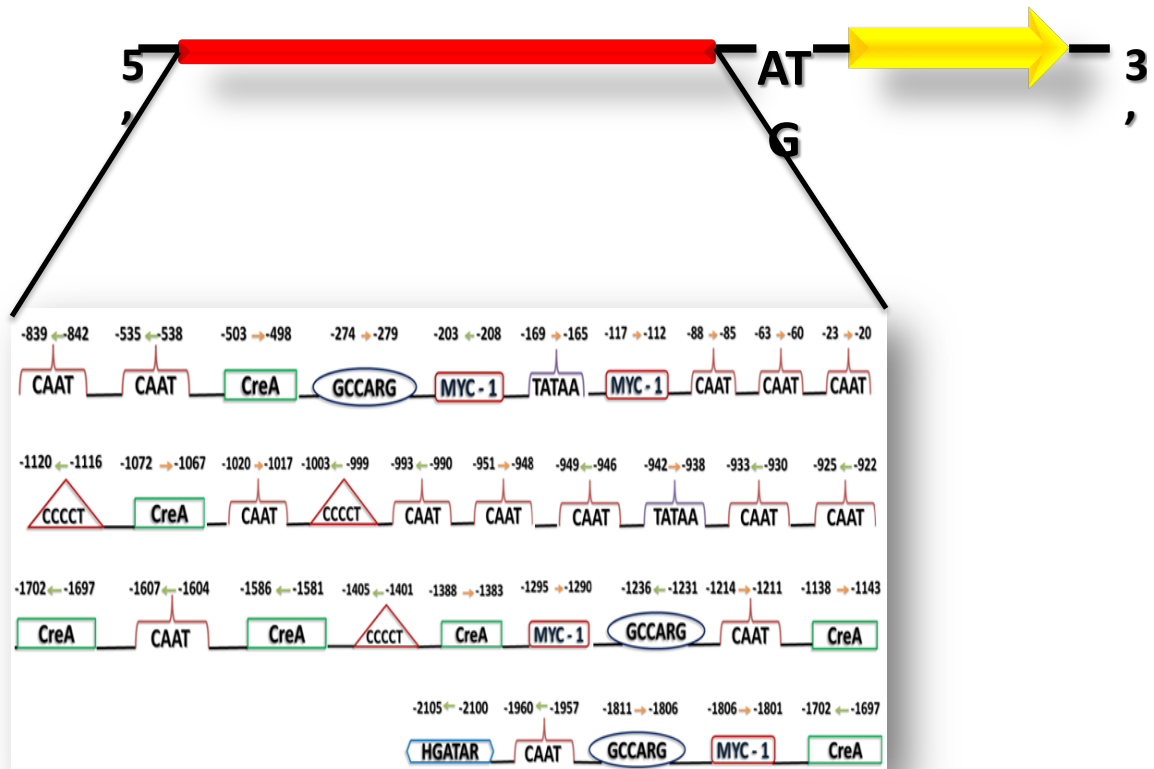

**Supplementary Figure 4:** Representation of predicted regulatory motifs in the promoter region of *T. harzianum epl-1* gene. The numbers indicate the position relative to the ATG translation start codon. Arrows indicate the orientation of the motif in the sense (5' → 3') and antisense strands (5' ← 3') respectively. **CAAT box** and **TATAA box** – transcription initiation sites; **MYC-1** – Mycoparasitism Response Element -1; **CreA** – Carbon response regulator; **GCCARG** – pH regulatory protein site; **CCCCT** – Stress response elements; **HGATAR** – Global nitrogen regulation.

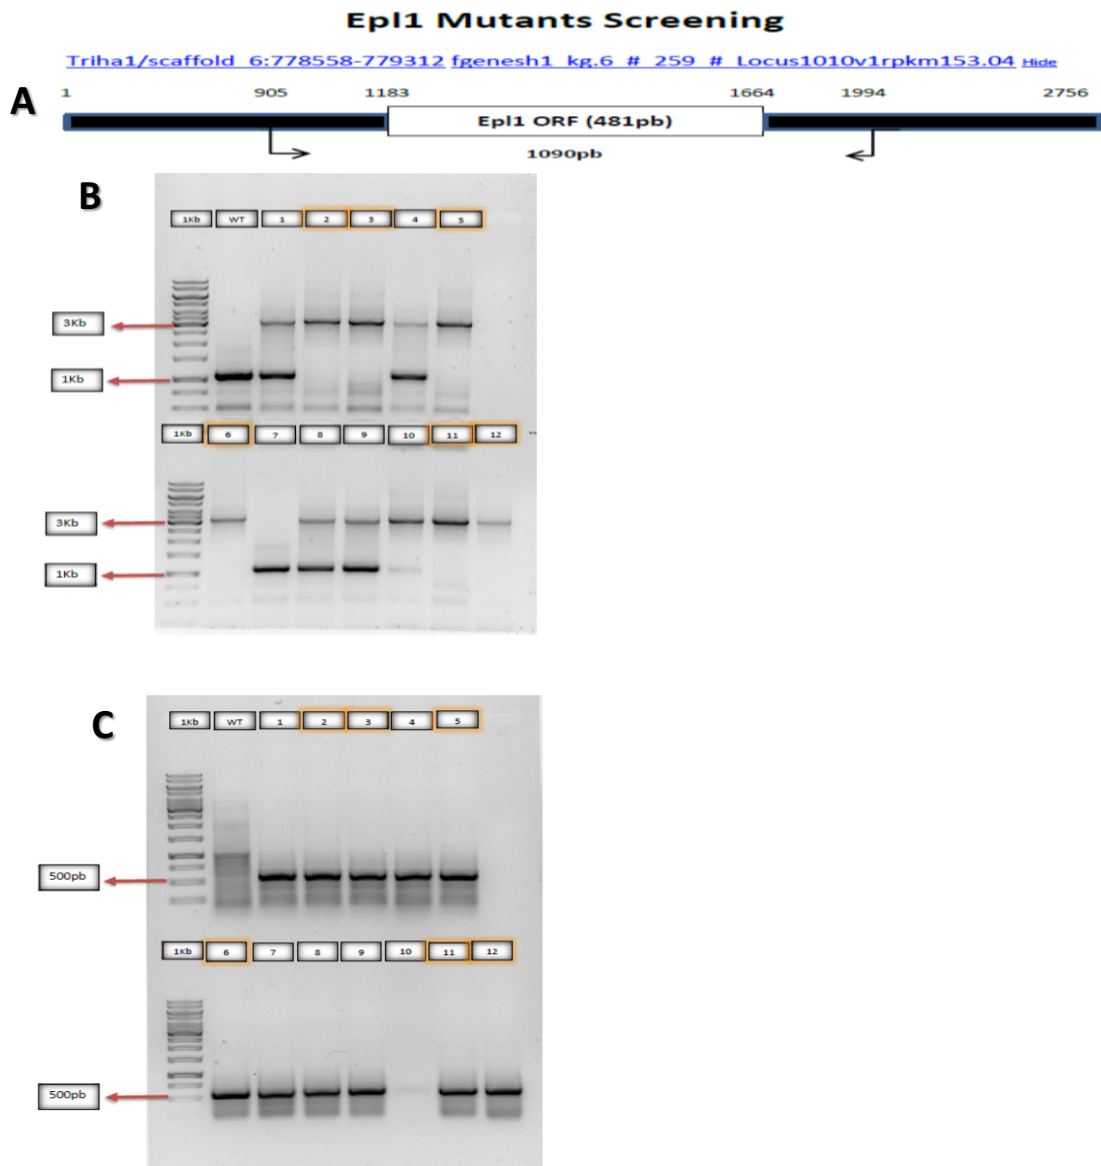

**Supplementary Figure 5:** Transformants screening scheme. **A** – Schematic representation of the genomic region containing the *epl-1* gene and the respective annealing sites of mutant screening primers set (MSEpl-1) (arrows). **B** – Mutant screening: agarose gel electrophoresis of *epl-1* gene PCR amplification. WT - *T. harzianum* wild type (1090 bp); 1 – 12- Screening of mitotically stable  $\Delta epl-1$  transformants (3457bp). **C** - Mutant screening agarose gel electrophoresis of *hph* gene PCR amplification. WT - *T. harzianum* wild type (no amplification); 1 – 12- Screening

of mitotically stable  $\Delta epl-1$  transformants (600bp). Individuals marked with orange rectangle were selected for further analysis; (1kb) Molecular weight marker.

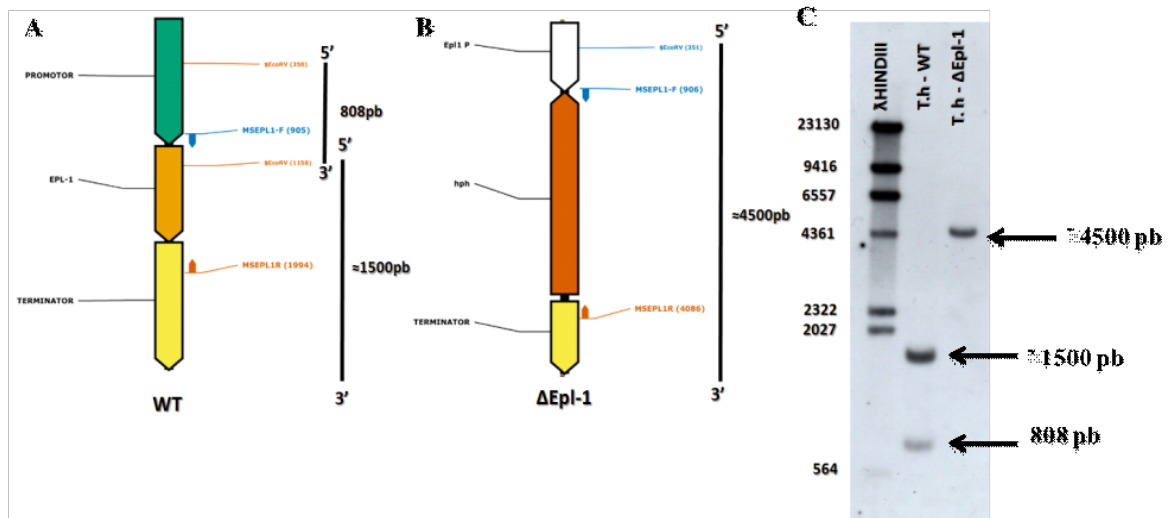

**Supplementary Figure 6:** Southern Blot analysis. **(A)** Representation of *epl-1* encoding gene in *T. harzianum* Wild Type strain with *EcoRV* restriction sites, the fragments formed after digestion with its respective size (vertical lines in black) and MSEpl-1 primers annealing sites for probe construction and hybridization; **(B)** Representation of *epl-1* deletion cassette with *EcoRV* restriction sites. The fragments formed after digestion with their respective sizes (vertical black lines) and MSEpl-1 primers annealing sites for probe hybridization; **(C)** Southern Blot Analysis of total DNA from *T. harzianum* Wild Type (*T.h* – WT) and *T. harzianum* Epl-1 deleted mutant (*T. h* -  $\Delta Epl-1$ ) digested with *EcoRV* endonuclease; ( $\lambda$ *HindIII*) Size Markers.

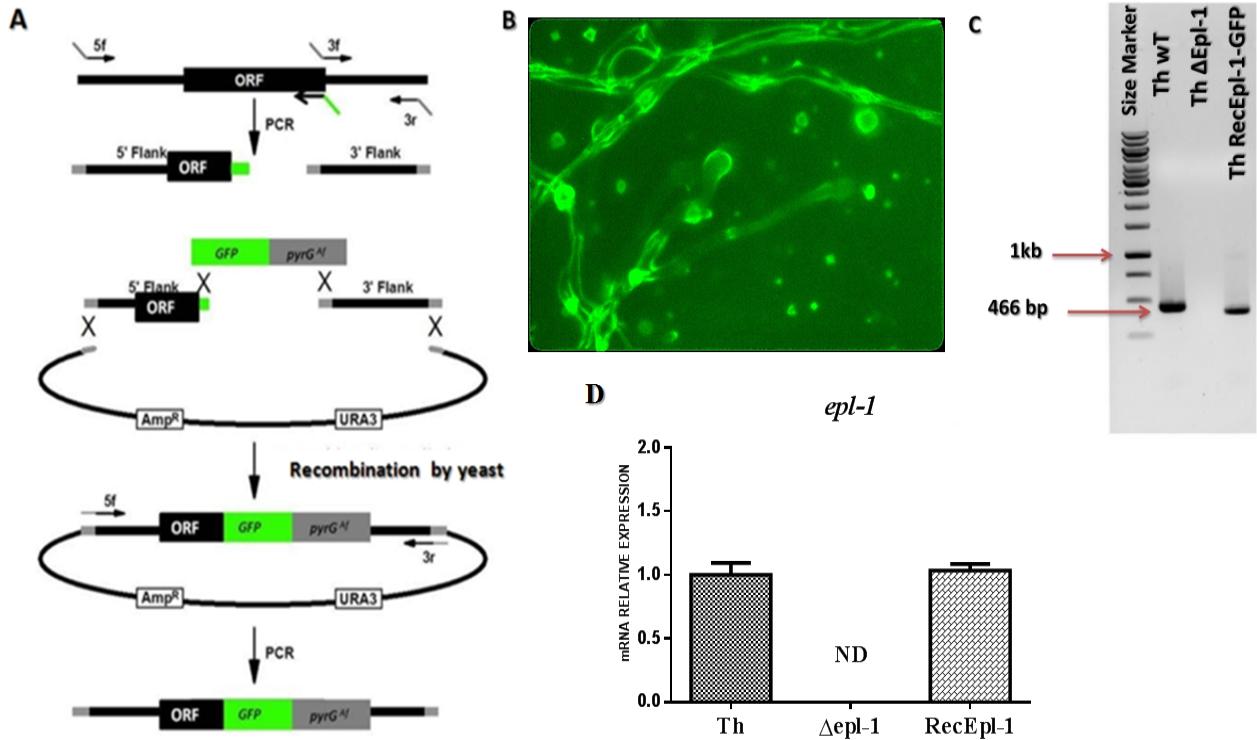

**Supplementary Figure 7:** *T. harzianum* RecEpl-1-GFP strain construction. **A** - Schematic representation of the Epl-1 recover cassette fused with GFP construction. **B** - *T. harzianum* RecEpl-1-GFP strain fluorescence microscopy, 40x magnification. **C** - agarose gel electrophoresis of *epl-1* gene PCR amplification. WT - *T. harzianum* wild type strain (466 bp); ThΔEpl-1 - *T. harzianum* Δ*epl-1* strain (no amplification product); Th RecEpl-1-GFP - *T. harzianum* *epl-1* complemented strain (466 bp). Size Marker - 1kb Molecular weight marker. **D** - Relative Expression levels (linear) of *epl-1* gene in different *T. harzianum* strains. (Th) *T. harzianum* (WT); (Δ*epl-1*) *T. harzianum* Δ*epl-1*; (RecEpl-1) *T. harzianum* RecEpl-1-GFP; (ND) No detected.

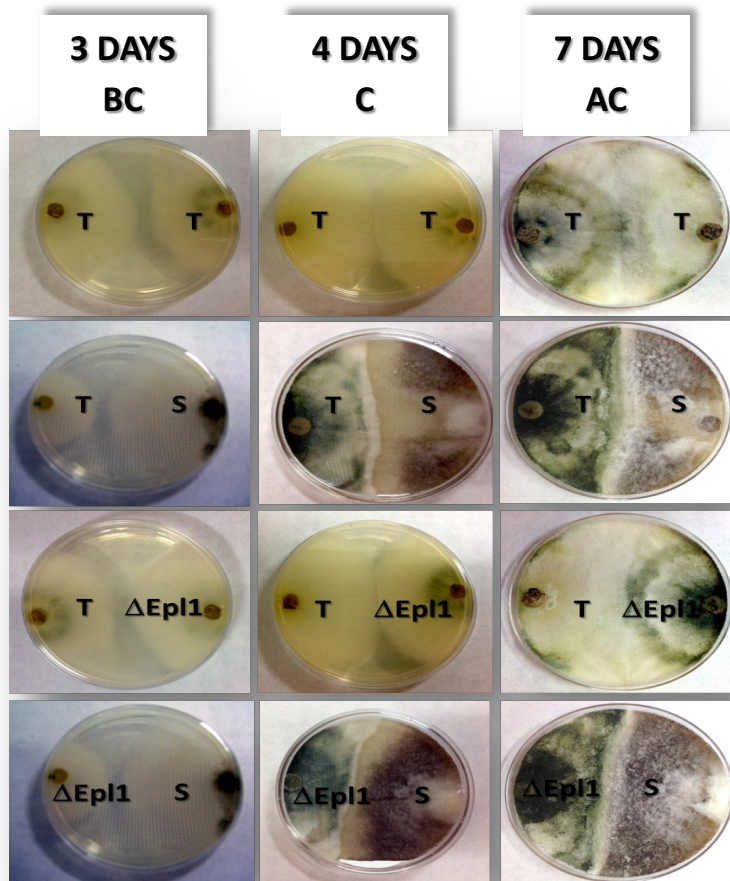

**Supplementary Figure 8:** Direct Confrontation Assay. (T) *T. harzianum* wild type; ( $\Delta$ Epl-1) *T. harzianum*  $\Delta$ epl-1; (S) *S. sclerotiorum*; BC – Before hyphae contact; C – hyphae contact; AC – After hyphae contact.



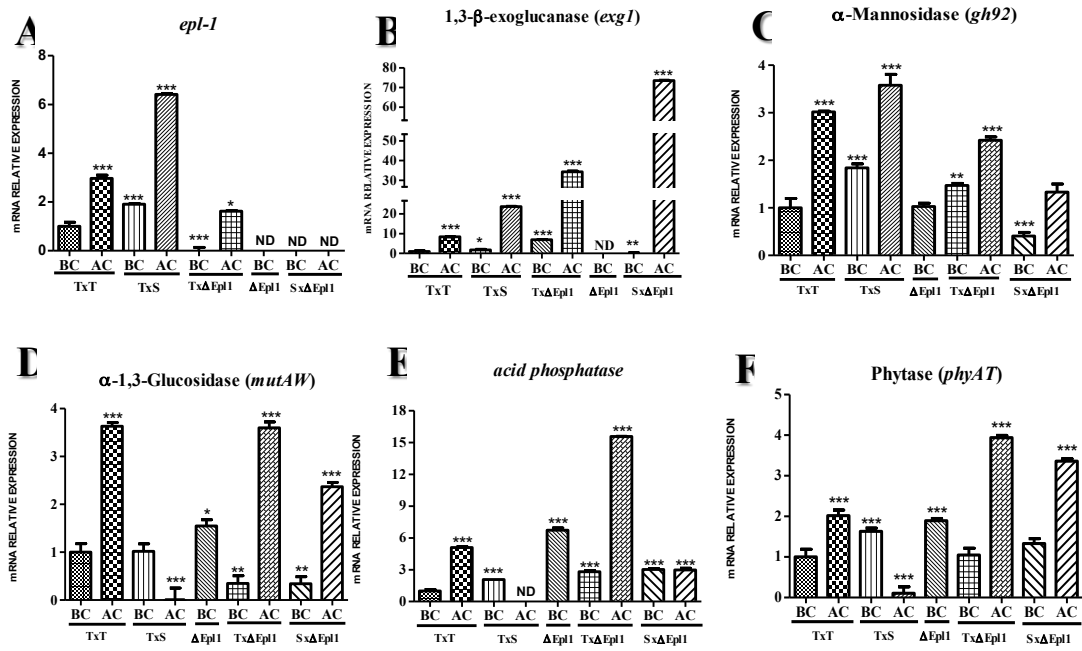

**Supplementary Figure 9:** Relative Expression levels (linear) of *T. harzianum* mycoparasitism-related genes in direct confrontation assay. (T) *T. harzianum* (WT); (S) *S. sclerotiorum*; (ΔEpl1) *T. harzianum* Δ*epl1*; (BC) before hyphae contact; (AC) after hyphae contact; (ND) No detected. The data were presented using the  $2^{-\Delta\Delta Ct}$  method. \*  $p < 0.05$ , \*\*  $p < 0.01$ , \*\*\*  $p < 0.001$ .

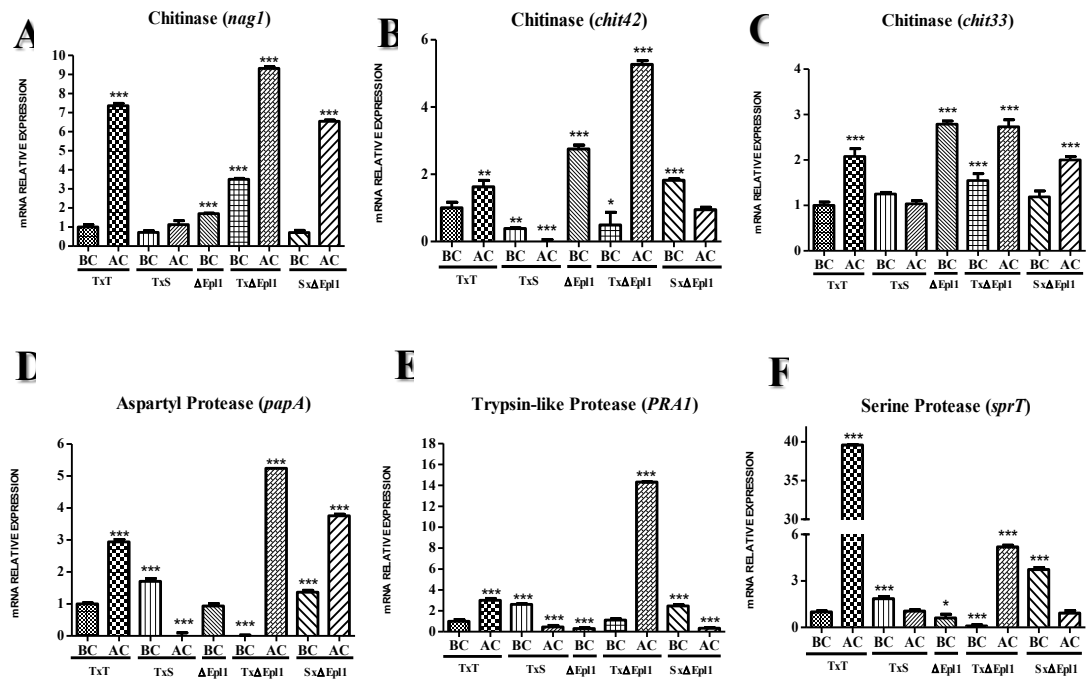

**Supplementary Figure 10: Relative Expression of *T. harzianum* mycoparasitism-related genes in direct confrontation assay. (T) *T. harzianum* (WT); (S) *S. sclerotiorum*; ( $\Delta$ Epl1) *T. harzianum*  $\Delta$ epl1; (NC) no hyphae contact; (C) with hyphae contact; (ND) No detected. The data were presented using the  $2^{-\Delta\Delta C_t}$  method. \*  $p < 0.05$ , \*\*  $p < 0.01$ , \*\*\*  $p < 0.001$ .**

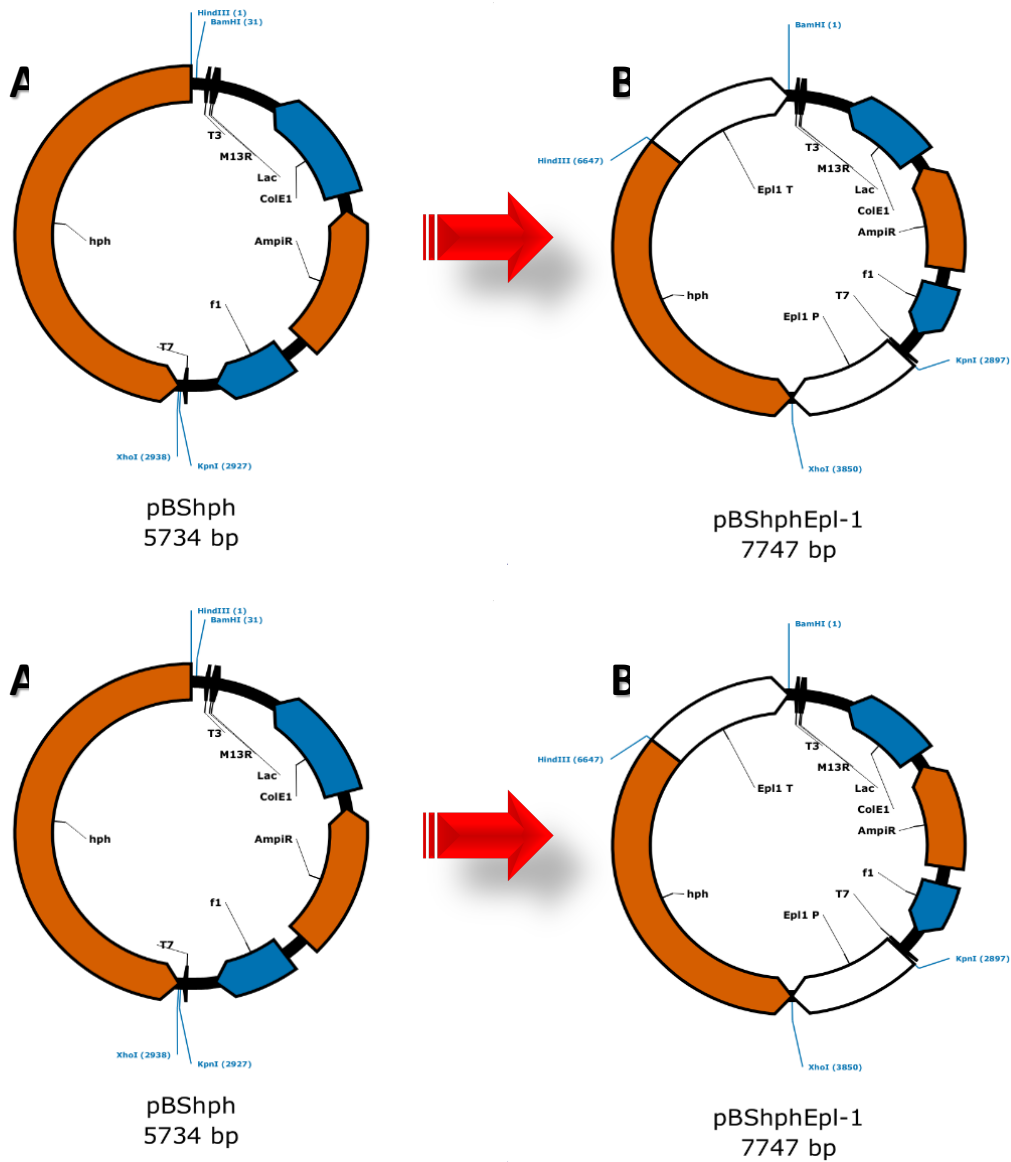

**Supplementary Figure 11:** Construction of Epl-1 deletion vector. A - pBluescript SK+ vector with selection *hph*-cassette (pBSshph) with its respective restriction sites. B – Complete pBSshphEpl-1 deletion vector with promoter and terminator *epl-1* region in its respective cloning sites.

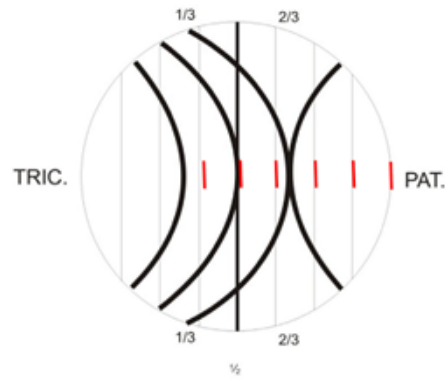

| Scores     | Classification |
|------------|----------------|
| Scores < 3 | Efficient      |
| Scores = 3 | Moderate       |
| Scores > 3 | Inefficient    |

**Supplementary Figure 12:** Schematic Bell et al., 1982 modified method, to classify *Trichoderma* strains in antagonistic activity assay in plate. TRIC. – *T. harzianum* strains. PAT. – Pathogen strains.

## 2 - Supplementary Videos Legends:

**Supplementary Video 1:** Fluorescence microscopy of *Trichoderma harzianum* RecEpl-1-GFP strain hyphae in 20x optical magnification.

**Supplementary Video 2:** Fluorescence microscopy of *Trichoderma harzianum* RecEpl-1-GFP strain hyphae in 40x optical magnification.
